# Supplementary material
Source: publisher site journal article supplement (https://www.dovepress.com/article/576470)
Supplement: Supplementary file 1 [file 576470%20Revised%20Supplementary%20Materials_1.docx]

**Supplementary Material 1: Codes and code text used for collection of SNOMED data from the Danish Pathology Registry in women with carcinoma in situ of the breast**

The Danish Pathology Registry (DPR) registered Systematized NOmenclature of MEDicine (SNOMED) combinations for the time periods 2008-2017 and 2008-2023, with separate registration for the right vs left breast. Combinations were (1) T-code (topography/location) for the breast including the papilla and areola with (2) M-codes (morphology) for precursor lesions of the beast M85XX2 or M85403 if (3) no invasive breast cancer diagnosis within +/- 90 days; ie T-codes for the breast including the papilla and areola, in the combination with morphology codes M8 with 3 in the fifth position (ie M8XXX3) or M90203 (phyllodes tumor, ie malignant). (see Supplementary Table 2 for all included SNOMED codes).

The algorithm also included women primarily diagnosed with malignant tumor cells on a fine needle aspiration (FNA), if they within 90 days were diagnosed with CIS in the same breast, as breast FNA cannot differentiate CIS from invasive carcinoma. Combinations were (1) T-codes for the breast including the papilla and areola with (2) the M-codes M80013, M80103 and M81403 combined with (3) the P-code FNA P31060. However, if the diagnosis exclusively was based on breast FNA, the patient was excluded.

The following cases were also disregarded:

- If the CIS diagnosis was exclusively based on a fine needle aspiration (FNA). Combinations were (1) T-codes for the breast including the papilla and areola with (2) M-codes for precursor lesions of the beast M85XX2 combined with (3) the P-code FNA P31060.
- If the CIS diagnosis exclusively was suspected, but not definitive. Combinations were (1) T-codes for the breast including the papilla and areola with (2) M-codes for precursor lesions of the breast M85XX2 combined with (3) the AE-code (etiology) ÆYYY00.
- Cases with carcinoma in situ with microinvasion. Combinations were (1) T-codes for the breast including papilla and areola with (2) M-codes for precursor lesions of the beast M85XX2 combined with (3) the AE-code ÆF5140.
- Cases with metastatic disease in the lymph nodes. Combinations were (1) T-codes for axillary, parasternal, infra- or supraclavicular or inframammary lymph nodes with (2) M-code M9 and diagnosed with CIS in the breast within +/´- 90 days.

**Supplementary Table 1: Information required for complete registration of *in situ* lesions in the Danish Breast Cancer Group** **database**

| Variable | Data type |
| --- | --- |
| Patho-anatomical information: | |
| Hospital department | Categorical (ID) |
| Specimen number | String (ID) |
| Laterality | Left/right |
| DCIS | Yes/no/unknown |
| Pure micropapillary type | Yes/no/unknown |
| LCIS | Yes/no/unknown |
| PLCIS | Yes/no/unknown |
| PDN | Yes/no/unknown |
| Microcalcifications | Yes/no/unknown |
| Lesion size, DCISa | mm |
| Lesion size, PLCISa | mm |
| Surgical margins, DCISa | mm |
| Surgical margins, PLCISa | mm |
| Nuclear gradea | 1/2/3 |
| Necrosisa | Yes/no |
| Van Nuys groupa | 1/2/3 |
| Sentinel Node procedure | Yes/No |
| Sentinel nodes removeda | 1/2/3/>3 |
| Surgical information: | |
| Biopsy date | dd.mm.yyyy |
| Lumpectomy date | dd.mm.yyyy |
| Mastectomy date | dd.mm.yyyy |
| Palpable tumor | Yes/no |
| Clinical PDN | Yes/no |
| Profound fascia on specimen | Yes/no |
| Tumor on imaging | Yes/no |
| Tissue density on imaging | Yes/no |
| Microcalcifications | Yes/no |
| Quadrant | Upper lateral/upper medial/lower lateral/lower medial/central |
| Oncological information: | |
| Menopausal status | Categorical |
| Adjuvant radiotherapya | Yes/no |
| Indication for follow-up | Yes/no |

**Notes:** aVariables only applicable to relevant patient subgroups
**Abbreviations:** DCIS, ductal carcinoma *in situ;* LCIS, lobular carcinoma *in situ;* PLCIS, pleomorphic LCIS; PDN, Paget’s disease of the nipple

**Supplementary Table 2: List of T-, M-, P- and AE- Systematized NOmenclature of MEDicine (SNOMED) codes with corresponding code text, included in the algorithm.**

| **Category** | **SNOMED-code** | **Corresponding SNOMED code text** |
| --- | --- | --- |
| **T-codes (topography) related to the breast and papilla** |  |  |
|  | T04000 | Breast |
|  | T04001 | Breast, right |
|  | T04002 | Breast, left |
|  | T04010 | Breast, female |
|  | T04020 | Breast, female, right |
|  | T04030 | Breast, female, left |
|  | T04280 | Axillary process of the breast |
|  | T0428A | Axillary process of the breast, right |
|  | T0428B | Axillary process of the breast, left |
|  | T04100 | Papilla of the breast |
|  | T0410A | Papilla of the breast, right |
|  | T0410B | Papilla of the breast, left |
|  | T04202 | Papilla and areola of the breast |
|  | T04200 | Areola of the breast |
|  | T0420A | Areola of the breast, right |
|  | T0420B | Areola of the breast, left |
|  | T0420E | Papilla and areola of the breast, right |
|  | T0420F | Papilla and areola of the breast, left |
| **T-codes related to the axilla/lymph nodes** |  |  |
|  | T0835C | Lymph node in the right breast, sentinel |
|  | T0871B | Lymph node in the right axilla, sentinel |
|  | TY8101 | Right axilla |
|  | T08711 | Lymph node in the right axilla |
|  | T08353 | Lymph node in the right breast |
|  | T08721 | Lymph node in the right processus axillaris |
|  | T08281 | Lymph node in the right infraclavicular region |
|  | T08221 | Lymph node in the right supraclavicular region |
|  | T0835D | Lymph node in the left breast, sentinel |
|  | T0871C | Lymph node in the left axilla, sentinel |
|  | TY8102 | Left axilla |
|  | T08712 | Lymph node in the left axilla |
|  | T08354 | Lymph node in the left breast |
|  | T08722 | Lymph node in the left processus axillaris |
|  | T08282 | Lymph node in the left infraclavicular region |
|  | T08222 | Lymph node in the left supraclavicular region |
|  | T08710 | Lymph node in the axilla |
|  | T0871A | Lymph node in the axilla, sentinel |
|  | T0800A | Lymph node, sentinel |
|  | T0835A | Lymph node in the breast, sentinel |
|  | T0835B | Lymph node parasternal, sentinel |
|  | T08352 | Lymph node in the breast |
|  | T08720 | Lymph node in the axillary process |
| **M-codes (morphology) related to *in situ* lesions** |  |  |
|  | M85002 | Ductal carcinoma in situ (DCIS) |
|  | M85202 | Lobular carcinoma in situ (LCIS) |
|  | M80102 | Carcinoma in situ |
|  | M850a2 | Ductal carcinoma in situ, micropapillary type |
|  | M85032 | Papillary ductal carcinoma in situ |
|  | M85092 | Solid papillary carcinoma in situ |
|  | M852A2 | Lobular carcinoma in situ, pleomorphic type |
|  | M852B2 | Lobular carcinoma in situ, florid subtype |
|  | M85012 | Ductal carcinoma in situ, comedotype |
|  | M85042 | Intracystic carcinoma, non-invasive |
|  | M85403 | Paget’s disease of the nipple.  *Code used until 31.12.2010* |
|  | M85402 | Paget’s disease of the nipple.  *Code used from 01.01.2011* |
| **M-codes related to**  **cytological malignant lesions** |  |  |
|  | M80013 | Malignant tumor cells |
|  | M80103 | Carcinoma |
|  | M81403 | Adenocarcinoma |
| **P-code (procedure or histopathology technique)** |  |  |
|  | P31060 | Fine needle aspiration |
|  | P30610 | Biopsy |
|  | P30613 | Punch biopsy |
|  | P30990 | Needle biopsy |
|  | P30992 | Needle biopsy, core |
|  | P30997 | Needle biopsy, core, CT-guided |
|  | P30999 | Needle biopsy, core stereotactic |
| **AE-codes (etiology)** |  |  |
|  | ÆYYY00 | Diagnosis suspected, but not definitive |
|  | ÆF5140 | Microinvasive |
